# Supplementary material for: Nutrition of Preterm Infants and Raw Breast Milk-Acquired Cytomegalovirus Infection: French National Audit of Clinical Practices and Diagnostic Approach
Source: MDPI journal article supplement (doi:10.3390/nu10081119), 2018-08-18
Supplement: s1 [file s1]

# Supplementary Materials: Nutrition of Preterm Infants and Raw Breast Milk-Acquired Cytomegalovirus Infection: French National Audit of Clinical Practices and Diagnostic Approach

Anne-Aurelie LOPES <sup>1,\*</sup>, Valerie CHAMPION <sup>2</sup> and Delphine MITANCHEZ <sup>2</sup>

## AUDIT on the nutrition of preterm infants with raw breast milk and the milk-acquired CMV infections.

In neonatology, breastfeeding is a crucial part in the management of preterm infants. International recommendations agreed on the contraindication to feed with raw breast milk preterm infants from CMV-positive mothers before a corrected age of 32 weeks or under a weight of 1500 g. However, since 2012, the American Academic of Pediatrics recommends nutrition with raw breast milk for all preterm infants, considering that the low risk of severe milk-acquired CMV infection does not offset the benefits of raw breast milk. Although the French recommendations maintain the contraindication, what are the current practices in France?

### General data:

Neonatal unit: ☐ NICU ☐ non-ICU  
Hospital:  
Approximate annual hospitalisations:  
≤ 32 weeks: ☐ Yes ☐ No  
≤ 1500 g: ☐ Yes ☐ No

### Current practices:

Use of frozen milk: ☐ Yes ☐ No  
Use of pasteurised milk: ☐ Yes ☐ No  
Use of raw milk: ☐ Yes ☐ No

Promotion of breastfeeding in the unit? ☐ Yes ☐ No  
Presence of a breastfeeding counsellor? ☐ Yes ☐ No  
Established protocol to help initial breastfeeding? ☐ Yes ☐ No

Access to a Human milk bank? ☐ Yes ☐ No

If the infant's mother milk is unavailable, is Human milk systematically used for infants before a corrected age of:

- <30 weeks? ☐ Yes ☐ No  
- <32 weeks? ☐ Yes ☐ No  
- <33 weeks? ☐ Yes ☐ No  
- <34 weeks? ☐ Yes ☐ No

Comments:

### Use of raw breast milk:

Use of raw breast milk (when it is used):

Unconditionally on all preterm infants: ☐ Yes ☐ No  
According to the CMV maternal status? ☐ Yes ☐ No  
Based on the infants' term: ☐ Yes ☐ No  
If yes; which term? ☐ >30 weeks ☐ >32 weeks ☐ >33 weeks ☐ >34 weeks  
Based on the infants' weight: ☐ Yes ☐ No  
If yes; which weight? ☐ >1000 g ☐ >1500 g ☐ >2000 g

Comments:

### What are the obstacles to the use of raw breast milk?

Risk of transmitting infections? ☐ Yes ☐ No  
Which ones? ☐ CMV ☐ HIV ☐ Others: .....

Comments:

### Postnatal CMV infections

Did milk-acquired CMV infections have been diagnosed in the unit? ☐ Yes ☐ No

If yes:  
The infection was: ☐ asymptomatic ☐ with mild signs  
☐ with severe signs ☐ "sepsis-like" symptoms

The evolution was: ☐ good ☐ bacterial coinfection  
☐ sepsis ☐ death

Comments:

Thanks for participating!

Figure S1. Translation of the questionnaire in English.

Table S1. Demographic data.

|                                                                        | NICU (n = 58)  | Non-ICU (n = 47) |
|------------------------------------------------------------------------|----------------|------------------|
| Overall hospitalisations                                               | 650 (140–2700) | 400 (150–1000)   |
| Hospitalisations of infants born before a corrected age under 32 weeks | 125 (20–400)   | 30 (0–250)       |
| Hospitalisations of infants born below a weight of 1500 g              | 115 (16–400)   | 26 (0–250)       |

The results are represented by the median and the extremes (minimum—maximum).
